# Supplementary material for: Regulated vesicle fusion generates signaling nanoterritories that control T cell activation at the immunological synapse
Source: PubMed Central journal article supplement — J Exp Med. 2013 Oct 21;210(11):2415–33. doi: 10.1084/jem.20130150 (PMC3804939; doi:10.1084/jem.20130150), 2013-10-21
Supplement: supp_jem.20130150_JEM_20130150_sm.pdf [file supp_jem.20130150_JEM_20130150_sm.pdf]

SUPPLEMENTAL MATERIAL

Soares et al., <http://www.jem.org/cgi/content/full/jem.20130150/DC1>

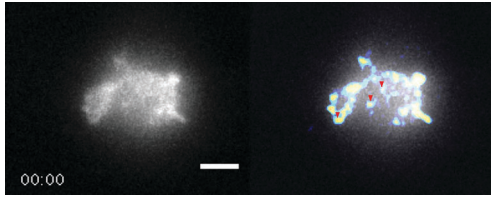

**Video 1. Vesicular LAT fusion at the synapse originates and sustains the elongated LAT clusters.** 3D live cell videomicroscopy of LAT-GFP-expressing Jurkat cells layed on a anti-CD3-coated coverslip. A 2.5- $\mu$ m optical slice is observed.
